# Supplementary material
Source: bioRxiv or medRxiv preprint supplement (https://www.biorxiv.org/highwire/filestream/75265/field_highwire_adjunct_files/2/246009-3.pdf)
Supplement: Supplementary file [file 246009-3.pdf]

| Authors and Publication year                            | No. of participants                                                                     | Participants' age in years: mean and/or range                                            | Behavioral measure correlated with FA                                                                                                                                                                                                                              | Coordinates of positive correlations between behavioral measures and FA: MNI, mm <sup>3</sup> | Coordinates of negative correlations between behavioral measures and FA: MNI, mm <sup>3</sup> |
|---------------------------------------------------------|-----------------------------------------------------------------------------------------|------------------------------------------------------------------------------------------|--------------------------------------------------------------------------------------------------------------------------------------------------------------------------------------------------------------------------------------------------------------------|-----------------------------------------------------------------------------------------------|-----------------------------------------------------------------------------------------------|
| Lebel et al. (2013)                                     | 136 participants (73M, 63F)                                                             | • Overall: mean=20.1, range=15-28                                                        | • Gray Oral Reading Test (GORT): fluency, speed and accuracy of reading text passages.<br>• Woodcock–Johnson Word Identification test: untimed measure of word reading.<br>• Woodcock–Johnson Word Attack test: untimed measure of pseudoword reading or decoding. | -10 -14 10                                                                                    |                                                                                               |
|                                                         |                                                                                         |                                                                                          |                                                                                                                                                                                                                                                                    | -20 42 10                                                                                     |                                                                                               |
|                                                         |                                                                                         |                                                                                          |                                                                                                                                                                                                                                                                    | 18 38 6                                                                                       |                                                                                               |
|                                                         |                                                                                         |                                                                                          |                                                                                                                                                                                                                                                                    | 26 18 13                                                                                      |                                                                                               |
|                                                         |                                                                                         |                                                                                          |                                                                                                                                                                                                                                                                    | 32 -19 -11                                                                                    |                                                                                               |
|                                                         |                                                                                         |                                                                                          |                                                                                                                                                                                                                                                                    | -20 28 -6                                                                                     |                                                                                               |
|                                                         |                                                                                         |                                                                                          |                                                                                                                                                                                                                                                                    | 5 -38 9                                                                                       |                                                                                               |
|                                                         |                                                                                         |                                                                                          |                                                                                                                                                                                                                                                                    | 30 -18 40                                                                                     |                                                                                               |
|                                                         |                                                                                         |                                                                                          | 35 -42 28                                                                                                                                                                                                                                                          |                                                                                               |                                                                                               |
| Odegard, Farris, Ring, McColl and Black (2009)          | 17 participants: • 10 dyslexics (7M, 3F)<br>• 7 non-impaired readers (2M, 5F)           | • Overall: range=10-14.<br>• Dyslexics: mean=12.20<br>• Non-impaired readers: mean=12.32 | • Decoding Skills Test: phonological decoding.<br>• Wechsler Individual Achievement Test Second Edition basic reading test: word reading and recognition.                                                                                                          | -14 -9 46                                                                                     | -8 -35 22                                                                                     |
|                                                         |                                                                                         |                                                                                          |                                                                                                                                                                                                                                                                    |                                                                                               |                                                                                               |
|                                                         |                                                                                         |                                                                                          |                                                                                                                                                                                                                                                                    | -20 -8 36                                                                                     |                                                                                               |
| Beaulieu et al. (2005)                                  | 32 participants (14M, 18F)                                                              | • Overall: mean=11.1, range=8.3-12.9                                                     | • Woodcock Reading Mastery Word Identification test: reading abilities.                                                                                                                                                                                            | -28 -14 24                                                                                    |                                                                                               |
|                                                         |                                                                                         |                                                                                          |                                                                                                                                                                                                                                                                    | 26 -14 24                                                                                     |                                                                                               |
|                                                         |                                                                                         |                                                                                          |                                                                                                                                                                                                                                                                    | -24 24 18                                                                                     |                                                                                               |
|                                                         |                                                                                         |                                                                                          |                                                                                                                                                                                                                                                                    | -22 -18 36                                                                                    |                                                                                               |
|                                                         |                                                                                         |                                                                                          |                                                                                                                                                                                                                                                                    | -18 -8 34                                                                                     |                                                                                               |
| Zhang et al. (2014)                                     | 93 American readers (39M, 54F)                                                          | • Overall: mean=20.8, range 18-30                                                        | • Test of Word Reading Efficiency Sight Word Efficiency (Form A) subtest (TOWRE-SWE): word reading accuracy and fluency.                                                                                                                                           | -3 -24 -22                                                                                    |                                                                                               |
|                                                         |                                                                                         |                                                                                          |                                                                                                                                                                                                                                                                    | 36 -5 -22                                                                                     |                                                                                               |
|                                                         |                                                                                         |                                                                                          |                                                                                                                                                                                                                                                                    | 13 22 20                                                                                      |                                                                                               |
|                                                         |                                                                                         |                                                                                          |                                                                                                                                                                                                                                                                    | -11 24 18                                                                                     |                                                                                               |
|                                                         |                                                                                         |                                                                                          |                                                                                                                                                                                                                                                                    | 9 30 6                                                                                        |                                                                                               |
|                                                         |                                                                                         |                                                                                          |                                                                                                                                                                                                                                                                    | -23 -53 9                                                                                     |                                                                                               |
|                                                         |                                                                                         |                                                                                          |                                                                                                                                                                                                                                                                    | -40 -8 -23                                                                                    |                                                                                               |
|                                                         | 89 Chinese readers (44M, 45F)                                                           | • Overall: mean=21.7, range=19-25                                                        | • Chinese Character Reading Efficiency test: format of TOWRE-SWE, word reading accuracy and fluency in Chinese.                                                                                                                                                    | -9 -3 -7                                                                                      |                                                                                               |
|                                                         |                                                                                         |                                                                                          |                                                                                                                                                                                                                                                                    | -17 -23 -6                                                                                    |                                                                                               |
|                                                         |                                                                                         |                                                                                          |                                                                                                                                                                                                                                                                    | -10 24 15                                                                                     |                                                                                               |
|                                                         |                                                                                         |                                                                                          |                                                                                                                                                                                                                                                                    | -14 -23 -3                                                                                    |                                                                                               |
|                                                         |                                                                                         |                                                                                          |                                                                                                                                                                                                                                                                    | 20 -25 49                                                                                     |                                                                                               |
|                                                         |                                                                                         |                                                                                          |                                                                                                                                                                                                                                                                    | -12 -26 -5                                                                                    |                                                                                               |
|                                                         |                                                                                         |                                                                                          |                                                                                                                                                                                                                                                                    | 27 -42 25                                                                                     |                                                                                               |
| 21 -29 48                                               |                                                                                         |                                                                                          |                                                                                                                                                                                                                                                                    |                                                                                               |                                                                                               |
|                                                         |                                                                                         |                                                                                          | -8 -21 1                                                                                                                                                                                                                                                           |                                                                                               |                                                                                               |
| Nagy, Westerberg and Klingberg (2004)                   | 23 participants (14M, 9F)                                                               | • Overall: mean=11.9, range=7.8-18.5                                                     | • Unstandardised reading task: timed speed and accuracy reading task.                                                                                                                                                                                              |                                                                                               | -27 -28.4 5.22                                                                                |
| Rimrodt, Peterson, Denckla, Kaufmann and Cutting (2010) | 31 participants: • 14 dyslexics (7M, 7F)<br>• 17 typically developing controls (9M, 8F) | • Overall range: 7-16<br>• Dyslexics: mean=11.0<br>• Controls: mean=11.0                 | • Test of Word Reading Efficiency - composite of Sight Word Efficiency and Phonemic Decoding Efficiency subtests: word identification, decoding pseudowords, and speech of accurate articulation.                                                                  | -54 4 30                                                                                      |                                                                                               |
|                                                         |                                                                                         |                                                                                          |                                                                                                                                                                                                                                                                    | 54 26 20                                                                                      |                                                                                               |
|                                                         |                                                                                         |                                                                                          |                                                                                                                                                                                                                                                                    | 60 8 10                                                                                       |                                                                                               |
|                                                         |                                                                                         |                                                                                          |                                                                                                                                                                                                                                                                    | -4 -94 -20                                                                                    |                                                                                               |
|                                                         |                                                                                         |                                                                                          |                                                                                                                                                                                                                                                                    | -6 72 58                                                                                      |                                                                                               |

|                         |                                                                                                               |                                                                                                                    |                                                                                                                                                                                                                                                                                                                                                                               |     |     |     |
|-------------------------|---------------------------------------------------------------------------------------------------------------|--------------------------------------------------------------------------------------------------------------------|-------------------------------------------------------------------------------------------------------------------------------------------------------------------------------------------------------------------------------------------------------------------------------------------------------------------------------------------------------------------------------|-----|-----|-----|
|                         |                                                                                                               |                                                                                                                    |                                                                                                                                                                                                                                                                                                                                                                               | -32 | 42  | -20 |
|                         |                                                                                                               |                                                                                                                    |                                                                                                                                                                                                                                                                                                                                                                               | -54 | 0   | -22 |
| Deutsch et al. (2005)   | 14 participants:<br>• 7 poor readers with previous dyslexia diagnosis (6M, 1F)<br>• 7 normal readers (6M, 1F) | • Overall: range=7-13<br>• Poor readers with previous dyslexia diagnosis: mean=11.0<br>• Normal readers: mean=10.4 | • Woodcock- Johnson Letter-Word Identification (WJ-LWID) and Word Attack (WJ-WA) subtests: word and pseudoword reading accuracy.<br>• Woodcock- Johnson Spelling subtest: spelling.<br>• Comprehensive Test of Phonological Processing (composite score): phonological awareness.<br>• Woodcock- Johnson Basic Reading Composite test: average of the WJ-LWID WJ-WA subtests. | -28 | -26 | 28  |
| Klingberg et al. (2000) | 17 participants:<br>• 6 poor readers with history of dyslexia (5M, 1F)<br>• 11 controls (6M, 5F)              | • Poor readers with history of dyslexia: mean=31.5<br>• Controls: mean=23.1                                        | • Woodcock Word ID test: word reading/decoding accuracy.<br>• Woodcock Word attack test: pseudoword decoding.                                                                                                                                                                                                                                                                 | -28 | -18 | 28  |
| Keller and Just (2009)  | 72 participants:<br>• 47 poor readers<br>• 25 good reading controls                                           | • Overall: range=8-12                                                                                              | • Woodcock Reading Mastery Word Attack test: word reading/decoding accuracy.                                                                                                                                                                                                                                                                                                  | -16 | 12  | 34  |

---
